# Supplementary material
Source: PubMed Central journal article supplement (PMC4289669)
Supplement: NIHMS648075-supplement-Table_S1.pdf [file NIHMS648075-supplement-Table_S1.pdf]

**Table 1.** Number and gender of *S. borellii* caught in and around the different audio traps used, where the crickets were caught, and how many days each trap was used at the different locations. Trapping locations correlate with Fig. 2C.

| Trap Type             | Trapping Location                                   |        |         |         |        |
|-----------------------|-----------------------------------------------------|--------|---------|---------|--------|
|                       | 1                                                   | 2      | 3       | 4       | 5      |
|                       | Mole Crickets Caught (F/M) [# of Days at Each Site] |        |         |         |        |
| Semi-permanent        | 16/0[53]                                            | -      | -       | -       | -      |
| Benjamin              | -                                                   | 2/2[1] | 6/2[1]  | 0/0[1]  | 0/0[1] |
| Cross                 | -                                                   | -      | 11/2[3] | 0/1[1]  | 0/0[1] |
| Sheet                 | -                                                   | 0/0[1] | 4/1[1]  | 10/0[2] | -      |
| Table                 | -                                                   | -      | 7/5[1]  | 1/0[1]  | 1/0[2] |
| Umbrella              | -                                                   | 1/0[2] | 1/0[1]  | 4/0[1]  | -      |
| Total Crickets Caught | 16                                                  | 5      | 39      | 16      | 1      |
